# Supplementary material for: Trends in the Incidence and Survival of Women with Hormone Receptor-Positive Breast Cancer from 1990–2019: A Large Population-Based Analysis
Source: Research Square preprint supplement (doi:10.21203/rs.3.rs-3569419/v1), 2023-11-10
Supplement: Supplementary file 1 [file 38b4f5d03c01bad885c9894d.xlsx]

## Sheet: Sheet1
		Table 2. Multivariable cox proportional hazards model
				Overall survival (OS)						Breast cancer-specific survival (BCSS)
		Varible		HR		95% CI		P Value		HR		95% CI		P Value
		Year group of diagnosis
		1990-1994		1 [Reference]				NA		1 [Reference]				NA
		1995-1999		0.95		0.94-0.97		<0.0001		0.91		0.88-0.93		<0.0001
		2000-2004		0.94		0.92-0.96		<0.0001		0.84		0.81-0.86		<0.0001
		2005-2009		0.9		0.88-0.92		<0.0001		0.79		0.76-0.81		<0.0001
		2010-2014		0.85		0.83-0.87		<0.0001		0.75		0.73-0.78		<0.0001
		2015-2019		0.78		0.76-0.81		<0.0001		0.73		0.70-0.76		<0.0001
		Year of diagnosisa		0.992		0.991-0.993		<0.0001		0.987		0.985-0.988		<0.0001
		Age group at diagnosis, year
		<30		1 [Reference]				NA		1 [Reference]				NA
		30-39		0.78		0.70-0.86		<0.0001		0.87		0.78-0.97		0.014
		40-49		0.61		0.55-0.67		<0.0001		0.67		0.61-0.75		<0.0001
		50-59		0.85		0.77-0.94		0.002		0.75		0.68-0.84		<0.0001
		60-69		1.55		1.40-1.71		<0.0001		0.88		0.79-0.98		0.02
		70-79		3.06		2.77-3.38		<0.0001		1.09		0.98-1.22		0.116
		80+		5.7		5.16-6.31		<0.0001		1.46		1.31-1.63		<0.0001
		Race/ethnic
		White		1 [Reference]				NA		1 [Reference]				NA
		Black		1.27		1.25-1.30		<0.0001		1.33		1.29-1.38		<0.0001
		Other		0.89		0.87-0.91		<0.0001		0.94		0.91-0.97		<0.0001
		Unknown		0.27		0.21-0.35		<0.0001		0.26		0.18-0.38		<0.0001
		Marital status at diagnosis
		Unmarried		1 [Reference]				NA		1 [Reference]				NA
		Married		0.78		0.78-0.79		<0.0001		0.83		0.82-0.85		<0.0001
		Unknown		0.96		0.93-0.99		0.009		1.01		0.97-1.06		0.55
		Hormone receptor status
		ER+/PR+		1 [Reference]				NA		1 [Reference]				NA
		ER+/PR-		1.16		1.14-1.18		<0.0001		1.35		1.32-1.38		<0.0001
		ER-/PR+		1.13		1.09-1.17		<0.0001		1.37		1.31-1.44		<0.0001
		Grade
		I		1 [Reference]				NA		1 [Reference]				NA
		II		1.14		1.12-1.16		<0.0001		1.57		1.52-1.62		<0.0001
		III		1.39		1.37-1.42		<0.0001		2.24		2.17-2.32		<0.0001
		IV		1.31		1.25-1.37		<0.0001		2.21		2.07-2.38		<0.0001
		Unknown		1.2		1.18-1.22		<0.0001		1.75		1.68-1.82		<0.0001
		Stage
		Tis		1 [Reference]				NA		1 [Reference]				NA
		I		1.38		0.97-1.96		0.074		2.91		1.09-7.76		0.033
		II		1.83		1.28-2.60		0.001		6.02		2.26-16.05		<0.0001
		III		3.54		2.49-5.04		<0.0001		15.92		5.97-42.45		<0.0001
		IV		9.47		6.66-13.48		<0.0001		51.7		19.40-137.82		<0.0001
		Unknown		1.69		1.18-2.40		0.004		5.5		2.06-14.67		0.001
		Node positivity
		Negative		1 [Reference]				NA		1 [Reference]				NA
		Positive		1.14		1.12-1.16		<0.0001		1.41		1.37-1.45		<0.0001
		Unknown		1.25		1.14-1.37		<0.0001		1.75		1.55-1.97		<0.0001
		Node examined
		0		1 [Reference]				NA		1 [Reference]				NA
		1-3		0.64		0.58-0.70		<0.0001		0.65		0.58-0.74		<0.0001
		4-9		0.7		0.64-0.77		<0.0001		0.73		0.64-0.82		<0.0001
		10+		0.7		0.64-0.77		<0.0001		0.7		0.62-0.80		<0.0001
		Unknown		1.08		0.99-1.18		0.065		1.2		1.08-1.35		0.001
		Radiation
		No/Unknown		1 [Reference]				NA		1 [Reference]				NA
		Yes		0.76		0.75-0.77		<0.0001		0.77		0.75-0.78		<0.0001
		Chemotherapy
		No/Unknown		1 [Reference]				NA		1 [Reference]				NA
		Yes		0.92		0.91-0.94		<0.0001		0.98		0.96-1.00		0.157
		Note: a We conducted another multivariate Cox model and only results of year of diagnosis (as a continuous varible) was shown in this table.
