# Supplementary material for: Trends in the Incidence and Survival of Women with Hormone Receptor-Positive Breast Cancer from 1990–2019: A Large Population-Based Analysis
Source: Research Square preprint supplement (doi:10.21203/rs.3.rs-3569419/v1), 2023-11-10
Supplement: Supplementary file 2 [file 4106ba0041d20b1bda3375b2.xlsx]

## Sheet: Sheet1
	Supplementary Table 2. Hazard ratios (Mantel-Haenszel) and Log-rank (Mantel-Cox) P-values of overall survival in subgroup analyses
	Subgroup	Age						Race						Stage				Radiation		Chemotherapy
		< 40		40-60		60+		White		Black		Others		Stage 0-II		Stage III-IV		Yes		Yes
		HR (95% CI)	P value*	HR (95% CI)	P value*	HR (95% CI)	P value*	HR (95% CI)	P value*	HR (95% CI)	P value*	HR (95% CI)	P value*	HR (95% CI)	P value*	HR (95% CI)	P value*	HR (95% CI)	P value*	HR (95% CI)	P value*
	1995-1999 vs. 1990-1994	0.90 (0.82-0.99)	0.0243	0.84 (0.81-0.87)	< 0.0001	0.93 (0.92-0.95)	< 0.0001	0.88 (0.87-0.90)	< 0.0001	0.88 (0.82-0.95)	0.0013	0.91 (0.85-0.97)	0.0064	0.89 (0.87-0.91)	< 0.0001	0.88 (0.85-0.91)	< 0.0001	0.88 (0.85-0.90)	< 0.0001	0.84 (0.81-0.87)	< 0.0001
	2000-2004 vs. 1990-1994	0.76 (0.69-0.84)	< 0.0001	0.69 (0.66-0.72)	< 0.0001	0.86 (0.84-0.88)	< 0.0001	0.76 (0.74-0.77)	< 0.0001	0.80 (0.73-0.86)	< 0.0001	0.83 (0.78-0.90)	< 0.0001	0.78 (0.77-0.80)	< 0.0001	0.79 (0.76-0.82)	< 0.0001	0.76 (0.73-0.78)	< 0.0001	0.66 (0.63-0.68)	< 0.0001
	2005-2009 vs. 1990-1994	0.57 (0.51-0.64)	< 0.0001	0.62 (0.59-0.65)	< 0.0001	0.80 (0.78-0.82)	< 0.0001	0.69 (0.68-0.71)	< 0.0001	0.64 (0.59-0.70)	< 0.0001	0.83 (0.76-0.90)	< 0.0001	0.72 (0.70-0.73)	< 0.0001	0.76 (0.73-0.80)	< 0.0001	0.65 (0.63-0.68)	< 0.0001	0.56 (0.53-0.58)	< 0.0001
	2010-2014 vs. 1990-1994	0.62 (0.55-0.70)	< 0.0001	0.60 (0.57-0.63)	< 0.0001	0.71 (0.69-0.73)	< 0.0001	0.66 (0.65-0.68)	< 0.0001	0.64 (0.58-0.71)	< 0.0001	0.73 (0.66-0.80)	< 0.0001	0.68 (0.66-0.70)	< 0.0001	0.80 (0.77-0.84)	< 0.0001	0.56 (0.54-0.59)	< 0.0001	0.55 (0.52-0.58)	< 0.0001
	2015-2019 vs. 1990-1994	0.53 (0.44-0.64)	< 0.0001	0.57 (0.53-0.62)	< 0.0001	0.65 (0.63-0.78)	< 0.0001	0.63 (0.61-0.66)	< 0.0001	0.53 (0.47-0.61)	< 0.0001	0.64 (0.55-0.73)	< 0.0001	0.63 (0.60-0.66)	< 0.0001	0.87 (0.82-0.92)	<0.0001	0.43 (0.40-0.46)	< 0.0001	0.55 (0.51-0.59)	< 0.0001
	2000-2004 vs. 1995-1999	0.86 (0.78-0.94)	0.002	0.85 (0.82-0.88)	< 0.0001	0.93 (0.91-0.95)	< 0.0001	0.87 (0.86-0.89)	< 0.0001	0.92 (0.86-0.99)	0.0326	0.94 (0.88-1.00)	0.0581	0.90 (0.88-0.91)	< 0.0001	0.90 (0.87-0.93)	< 0.0001	0.89 (0.87-0.91)	< 0.0001	0.82 (0.80-0.85)	< 0.0001
	2005-2009 vs. 1995-1999	0.66 (0.59-0.74)	< 0.0001	0.79 (0.76-0.82)	< 0.0001	0.88 (0.86-0.90)	< 0.0001	0.81 (0.80-0.83)	< 0.0001	0.78 (0.72-0.84)	< 0.0001	0.95 (0.89-1.02)	0.1835	0.84 (0.82-0.86)	< 0.0001	0.87 (0.84-0.91)	< 0.0001	0.82 (0.79-0.84)	< 0.0001	0.73 (0.70-0.76)	< 0.0001
	2010-2014 vs. 1995-1999	0.76 (0.67-0.86)	< 0.0001	0.80 (0.76-0.84)	< 0.0001	0.79 (0.77-0.81)	< 0.0001	0.79 (0.77-0.81)	< 0.0001	0.78 (0.71-0.85)	< 0.0001	0.90 (0.83-0.98)	0.0178	0.80 (0.78-0.83)	< 0.0001	0.90 (0.86-0.94)	< 0.0001	0.75 (0.73-0.78)	< 0.0001	0.76 (0.73-0.79)	< 0.0001
	2015-2019 vs. 1995-1999	0.67 (0.55-0.81)	<0.0001	0.78 (0.73-0.85)	< 0.0001	0.72 (0.69-0.75)	< 0.0001	0.75 (0.72-0.78)	< 0.0001	0.65 (0.57-0.73)	< 0.0001	0.85 (0.75-0.97)	0.0171	0.75 (0.72-0.79)	< 0.0001	0.97 (0.91-1.02)	0.2549	0.64 (0.60-0.68)	< 0.0001	0.81 (0.76-0.86)	< 0.0001
	2005-2009 vs. 2000-2004	0.78 (0.70-0.87)	< 0.0001	0.94 (0.90-0.98)	0.0016	0.95 (0.93-0.97)	<0.0001	0.94 (0.92-0.96)	< 0.0001	0.87 (0.81-0.94)	0.0002	1.00 (0.94-1.07)	0.8903	0.94 (0.91-0.96)	0.0001	0.97 (0.93-1.00)	0.0883	0.92 (0.90-0.95)	< 0.0001	0.93 (0.89-0.96)	< 0.0001
	2010-2014 vs. 2000-2004	0.93 (0.82-1.06)	0.2783	0.95 (0.91-0.99)	0.0387	0.86 (0.84-0.89)	<0.0001	0.91 (0.89-0.94)	< 0.0001	0.90 (0.83-0.97)	0.008	0.97 (0.89-1.05)	0.4065	0.91 (0.88-0.93)	< 0.0001	1.00 (0.96-1.05)	0.891	0.87 (0.84-0.90)	< 0.0001	1.00 (0.96-1.05)	0.887
	2015-2019 vs. 2000-2004	0.89 (0.72-1.10)	0.2737	0.94 (0.87-1.01)	0.1025	0.79 (0.75-0.82)	<0.0001	0.86 (0.83-0.89)	< 0.0001	0.81 (0.72-0.91)	0.0006	0.96 (0.85-1.09)	0.548	0.84 (0.80-0.88)	<0.0001	1.10 (1.03-1.16)	0.0023	0.76 (0.71-0.81)	< 0.0001	1.12 (1.04-1.19)	0.0014
	2010-2014 vs. 2005-2009	1.18 (1.04-1.34)	0.012	1.02 (0.98-1.07)	0.3382	0.90 (0.87-0.92)	<0.0001	0.97 (0.95-0.99)	0.0144	0.99 (0.92-1.07)	0.8771	0.94 (0.87-1.01)	0.1135	0.96 (0.94-0.99)	0.0095	1.02 (0.98-1.07)	0.2503	0.97 (0.93-1.00)	0.067	1.08 (1.04-1.13)	0.0002
	2015-2019 vs. 2005-2009	1.01 (0.82-1.26)	0.8897	1.01 (0.93-1.09)	0.7886	0.80 (0.77-0.83)	< 0.0001	0.90 (0.87-0.94)	< 0.0001	0.86 (0.77-0.96)	0.0096	0.90 (0.80-1.01)	0.0879	0.89 (0.85-0.93)	<0.0001	1.09 (1.03-1.16)	0.002	0.84 (0.79-0.90)	<0.0001	1.18 (1.10-1.26)	< 0.0001
	2015-2019 vs. 2010-2014	0.90 (0.74-1.10)	0.3073	0.92 (0.85-0.99)	0.0226	0.89 (0.85-0.92)	< 0.0001	0.92 (0.88-0.95)	< 0.0001	0.87 (0.79-0.97)	0.0103	0.97 (0.87-1.08)	0.576	0.90 (0.86-0.95)	<0.0001	1.06 (1.00-1.12)	0.0435	0.87 (0.82-0.93)	< 0.0001	1.04 (0.98-1.11)	0.2157
	* Log-rank p value < 0.0033 was considered statistically significant in pairwise-comparison analysis.
