# Supplementary material for: Trends in the Incidence and Survival of Women with Hormone Receptor-Positive Breast Cancer from 1990–2019: A Large Population-Based Analysis
Source: Research Square preprint supplement (doi:10.21203/rs.3.rs-3569419/v1), 2023-11-10
Supplement: Supplementary file 3 [file 60755ca03c53c2ccaf32ae88.xlsx]

## Sheet: Sheet1
		Table 1. Patient and tumor characteristics stratified by year of diagnosis
			All patients (N = 370 729)										Year group
					1990-1994			1995-1999			2000-2004			2005-2009			2010-2014			2015-2019
					(N = 37 943)			(N = 49 266)			(N = 55 652)			(N = 64 451)			(N = 77 127)			(N = 86 290)
		Variable	n (%)		n	%a		n	%a		n	%a		n	%a		n	%a		n	%a		P for trendb
		Age group at diagnosis, year
		<30	1535 (0.4)		150	0.4		180	0.4		180	0.3		267	0.4		350	0.5		408	0.5		0.012
		30-39	14 911 (4.0)		1946	5.1		2088	4.2		2301	4.1		2470	3.8		2858	3.7		3248	3.8
		40-49	59 061 (15.9)		6236	16.4		8150	16.5		9611	17.3		11 337	17.6		11 701	15.2		12 026	13.9
		50-59	83 356 (22.5)		6786	17.9		10 685	21.7		13 395	24.1		15 593	20.3		17 968	23.3		18 929	21.9
		60-69	93 468 (25.2)		9204	24.3		10 752	21.8		12 083	24.7		15 361	23.8		21 281	27.6		24 787	28.7
		70-79	75 450 (20.4)		8848	23.3		11 319	23		11 319	20.3		11 424	17.7		14 392	18.7		18 148	21
		80+	42 948 (11.6)		4773	12.6		6092	12.4		6763	12.2		7999	12.4		8577	11		8744	10.2
		Race/ethnic
		White	306 153 (82.6)		33 606	88.6		42 855	87		47 440	85.2		53 360	82.8		61 756	80.1		67 136	77.8		<0.0001
		Black	24 092 (6.5)		1651	4.4		2356	4.8		2945	5.3		4218	6.5		5870	7.6		7052	8.2
		Otherc	39 217 (10.6)		2667	7		3979	8.1		5161	9.3		6694	10.4		9239	12		11 477	13.3
		Unknown	1267 (0.3)		19	0		76	0.1		106	0.2		179	0.3		262	0.3		625	0.7
		Marital status at diagnosis
		Unmarried	148 918 (40.2)		16 045	42.3		20 349	41.3		22 585	40.6		26 175	40.6		30 625	39.7		33 139	38.4		<0.0001
		Married	206 894 (55.8)		21 096	55.6		27 787	56.4		31 719	57		35 563	55.2		42 412	55		48 317	56
		Unknown	14 917 (4.0)		802	2.1		1130	2.3		1348	2.4		2713	4.2		4090	5.3		4834	5.6
		Hormone receptor status
		ER+/PR+	308 672 (83.3)		29 681	78.2		40 016	81.2		46 078	82.8		54 012	83.8		65 270	84.6		73 615	85.3		<0.0001
		ER+/PR-	54 709 (14.8)		6362	16.8		7434	15.1		8459	15.2		9606	14.9		10 989	14.2		11 859	13.7
		ER-/PR+	7348 (1.9)		1900	5		1816	3.7		1115	2		833	1.3		868	1.2		816	2
		Grade
		I	89 828 (24.2)		3994	10.5		9926	20.1		13 697	24.6		17 404	27		21 475	24		23 332	27		<0.0001
		II	162 129 (43.7)		12 655	33.4		20 742	42.1		24 916	44.8		29 585	45.9		35 659	46.2		38 572	44.7
		III	79 507 (21.4)		9120	24		11 771	23.9		12 649	22.7		13 903	21.6		16 621	21.6		15 443	17.9
		IV	3248 (0.9)		1145	3		1142	2.3		613	1.1		229	0.4		105	0.1		14	0
		Unknown	36 017 (9.7)		11 029	29.1		5685	11.6		3777	6.8		3330	5.1		3267	4.1		8929	10.4
		Staged
		Tis	170 (0.1)		6	0		5	0		10	0		42	0.1		41	0.1		66	0.1		<0.0001
		I	198 221 (53.5)		17 311	43.6		24 274	49.3		28 660	51.5		33 432	51.9		40 208	52.1		54 336	63
		II	105 290 (28.4)		10 828	28.5		13 701	27.8		16 891	30.4		19 834	30.8		24 689	32		19 347	22.4
		III	35 511 (9.6)		4981	13.1		5447	11.1		5792	10.4		6478	10.1		7111	9.2		5702	6.6
		IV	13 273 (3.6)		1186	3.1		1382	2.8		1624	2.9		2351	3.6		3102	4		3628	4.2
		Unknown	18 264 (4.9)		3631	9.7		4457	9		2675	4.8		2314	3.5		1976	2.6		3211	4.7
		Node positivity
		Negative	220 335 (59.4)		21 304	56.1		27 095	55		32 532	58.5		38 690	60		47 112	61.1		53 602	62.1		<0.0001
		Positive	100 236 (27.0)		10 996	29		13 289	27		16 268	29.2		18 054	28		20 312	26.3		21 317	24.7
		Unknown	50 158 (13.6)		5643	14.9		8882	18		6852	12.3		7707	12		9703	12.6		11 371	13.2
		Node examined
		0	49 058 (13.2)		5558	14.6		8819	17.9		6762	12.2		7476	11.6		9421	12.2		11 022	12.8		<0.0001
		1-3	128 260 (34.6)		671	1.8		1977	4		14 107	25.3		26 782	41.6		38 480	49.9		46 243	53.6
		4-9	73 843 (19.9)		5775	13.6		8124	16.5		12 740	22.9		14 317	22.2		15 768	20.4		17 719	20.5
		10+	112 438 (30.3)		26 011	68.6		29 836	60.6		21 398	38.4		14 940	23.2		11 671	15.1		8582	9.9
		Unknown	7130 (2.0)		528	1.4		510	1		645	1.2		936	1.4		1787	2.4		2724	3.2
		Radiation
		No/Unknown	175 888 (47.4)		23 596	62.2		24 402	49.5		24 821	44.6		30 079	46.7		35 229	45.7		37 761	43.8		<0.0001
		Yes	194 841 (52.6)		14 347	37.8		24 864	50.5		30 831	55.4		34 372	53.3		41 898	54.3		48 529	56.2
		Chemotherapy
		No/Unknown	251 954 (68.0)		28 817	75.9		34 807	70.7		35 689	64.1		41 265	64		51 337	66.6		60 039	69.6		<0.0001
		Yes	118 775 (32.0)		9126	24.1		14 459	29.3		19 963	35.9		23 186	36		25 790	33.4		26 251	30.4
		Vital status
		Alive	242 015 (65.3)		9648	25.4		18 505	37.6		29 023	52.1		42 585	66.1		61 266	79.4		80 988	93.9		<0.0001
		Died of breast cancer	49 018 (13.2)		9971	26.3		10 483	21.3		9379	16.9		8841	13.7		7468	9.7		2876	3.3
		Died of other cause	79 696 (21.5)		18 324	48.3		20 278	41.1		17 250	31		13 025	20.2		8393	10.9		2426	2.8
		Note:
		a Column percentage can differ slightly from 100% due to rounding.
		b Trends in patient and tumor characteristics are presented as six time periods (1990-1994, 1995-1999, 2000-2004, 2005–2009, 2010-2014, and 2015–2019). We used the Mantel–Haenszel test to evaluate the P for trend.
		c Other race comprised American Indian/AK Native or Asian/Pacific Islander.
		d Combined stage, breast - adjusted AJCC 6th stage (1988-2015), derived SEER Cmb Stg Grp (2016-2017), and derived EOD 2018 Stage Group (2018+).
