# Supplementary material for: Trends in the Incidence and Survival of Women with Hormone Receptor-Positive Breast Cancer from 1990–2019: A Large Population-Based Analysis
Source: Research Square preprint supplement (doi:10.21203/rs.3.rs-3569419/v1), 2023-11-10
Supplement: Supplementary file 4 [file 6d8453489af91937bdb1be37.xlsx]

## Sheet: Sheet1
	Supplementary Table 1.Time trend analysis of standardized incidence rate of hormone receptor-positive breast cancer in different age groups from 1990 to 2019
	Age, y		AAPC / %		95% CI		P
	20 ~		2.68		0.73 - 4.68		0.009
	25 ~		3.62		2.99 - 4.25		< 0.001
	30 ~		2.71		2.28 - 3.14		< 0.001
	35 ~		1.38		0.67 - 2.10		< 0.001
	40 ~		2.07		1.87 - 2.26		< 0.001
	45 ~		1.73		1.56 - 1.90		< 0.001
	50 ~		1.77		1.14 - 2.40		< 0.001
	55 ~		1.53		1.00 - 2.07		< 0.001
	60 ~		1.47		0.40 - 2.56		0.007
	65 ~		1.55		0.46 - 2.65		0.005
	70 ~		1.86		1.24 - 2.47		< 0.001
	75 ~		1.22		0.43 - 2.01		0.002
	80 ~		1.02		0.63 - 1.42		< 0.001
	85 +		0.5		-0.02 - 1.03		0.061
