# Supplementary material for: Trends in the Incidence and Survival of Women with Hormone Receptor-Positive Breast Cancer from 1990–2019: A Large Population-Based Analysis
Source: Research Square preprint supplement (doi:10.21203/rs.3.rs-3569419/v1), 2023-11-10
Supplement: Supplementary file 5 [file 9b5b3c79ea8427ee25656a68.xlsx]

## Sheet: Sheet1
	Supplementary Table 3. Hazard ratios (Mantel-Haenszel) and Log-rank (Mantel-Cox) P-values of breast cancer-specific survival in subgroup analyses
	Subgroup	Age						Race						Stage				Radiation		Chemotherapy
		< 40		40-60		60+		White		Black		Others		Stage 0-II		Stage III-IV		Yes		Yes
		HR (95% CI)	P value*	HR (95% CI)	P value*	HR (95% CI)	P value*	HR (95% CI)	P value*	HR (95% CI)	P value*	HR (95% CI)	P value*	HR (95% CI)	P value*	HR (95% CI)	P value*	HR (95% CI)	P value*	HR (95% CI)	P value*
	1995-1999 vs. 1990-1994	0.87 (0.79-0.96)	0.0049	0.80 (0.76-0.83)	< 0.0001	0.82 (0.79-0.86)	< 0.0001	0.81 (0.78-0.83)	< 0.0001	0.82 (0.74-0.92)	0.0004	0.78 (0.70-0.87)	< 0.0001	0.80 (0.77-0.83)	< 0.0001	0.89 (0.85-0.93)	< 0.0001	0.75 (0.72-0.79)	< 0.0001	0.77 (0.73-0.80)	< 0.0001
	2000-2004 vs. 1990-1994	0.72 (0.65-0.80)	< 0.0001	0.62 (0.59-0.65)	< 0.0001	0.72 (0.69-0.75)	< 0.0001	0.66 (0.64-0.68)	< 0.0001	0.71 (0.63-0.79)	< 0.0001	0.66 (0.59-0.74)	< 0.0001	0.63 (0.61-0.66)	< 0.0001	0.80 (0.76-0.83)	< 0.0001	0.58 (0.55-0.61)	< 0.0001	0.53 (0.50-0.55)	< 0.0001
	2005-2009 vs. 1990-1994	0.54 (0.48-0.61)	< 0.0001	0.56 (0.53-0.59)	< 0.0001	0.73 (0.70-0.76)	< 0.0001	0.63 (0.60-0.65)	< 0.0001	0.57 (0.51-0.64)	< 0.0001	0.68 (0.61-0.77)	< 0.0001	0.57 (0.54-0.59)	< 0.0001	0.78 (0.74-0.82)	< 0.0001	0.50 (0.48-0.53)	< 0.0001	0.46 (0.43-0.48)	< 0.0001
	2010-2014 vs. 1990-1994	0.60 (0.53-0.68)	< 0.0001	0.56 (0.52-0.59)	< 0.0001	0.69 (0.66-0.73)	< 0.0001	0.62 (0.60-0.64)	< 0.0001	0.58 (0.51-0.66)	< 0.0001	0.60 (0.53-0.69)	< 0.0001	0.54 (0.51-0.57)	< 0.0001	0.82 (0.78-0.86)	< 0.0001	0.46 (0.44-0.49)	< 0.0001	0.46 (0.43-0.49)	< 0.0001
	2015-2019 vs. 1990-1994	0.53 (0.44-0.64)	< 0.0001	0.54 (0.50-0.59)	< 0.0001	0.69 (0.65-0.73)	< 0.0001	0.62 (0.59-0.66)	< 0.0001	0.52 (0.44-0.61)	< 0.0001	0.58 (0.48-0.69)	< 0.0001	0.56 (0.52-0.61)	< 0.0001	0.89 (0.83-0.94)	0.0003	0.37 (0.34-0.41)	< 0.0001	0.50 (0.46-0.54)	< 0.0001
	2000-2004 vs. 1995-1999	0.84 (0.76-0.93)	0.001	0.80 (0.76-0.84)	< 0.0001	0.89 (0.86-0.93)	< 0.0001	0.83 (0.81-0.86)	< 0.0001	0.87 (0.79-0.97)	0.0094	0.86 (0.78-0.96)	0.0053	0.82 (0.79-0.85)	< 0.0001	0.89 (0.85-0.93)	< 0.0001	0.81 (0.78-0.85)	< 0.0001	0.73 (0.70-0.76)	< 0.0001
	2005-2009 vs. 1995-1999	0.64 (0.57-0.71)	< 0.0001	0.74 (0.71-0.78)	< 0.0001	0.91 (0.87-0.95)	< 0.0001	0.80 (0.77-0.83)	< 0.0001	0.75 (0.67-0.83)	< 0.0001	0.89 (0.80-0.98)	0.0259	0.76 (0.72-0.79)	< 0.0001	0.87 (0.83-0.91)	< 0.0001	0.73 (0.70-0.77)	< 0.0001	0.65 (0.62-0.68)	< 0.0001
	2010-2014 vs. 1995-1999	0.75 (0.66-0.85)	< 0.0001	0.76 (0.72-0.80)	< 0.0001	0.87 (0.84-0.91)	< 0.0001	0.81 (0.78-0.84)	< 0.0001	0.76 (0.68-0.84)	< 0.0001	0.84 (0.74-0.94)	0.004	0.76 (0.72-0.80)	< 0.0001	0.91 (0.87-0.95)	0.0001	0.71 (0.68-0.75)	< 0.0001	0.69 (0.65-0.72)	< 0.0001
	2015-2019 vs. 1995-1999	0.67 (0.55-0.82)	0.0001	0.77 (0.70-0.84)	< 0.0001	0.84 (0.79-0.90)	< 0.0001	0.82 (0.77-0.86)	< 0.0001	0.63 (0.54-0.73)	< 0.0001	0.83 (0.70-0.99)	0.0388	0.79 (0.73-0.86)	< 0.0001	0.98 (0.92-1.05)	0.6404	0.61 (0.57-0.67)	< 0.0001	0.76 (0.71-0.82)	< 0.0001
	2005-2009 vs. 2000-2004	0.76 (0.68-0.86)	< 0.0001	0.92 (0.88-0.97)	0.0012	1.01 (0.97-1.06)	0.5033	0.95 (0.92-0.99)	0.007	0.85 (0.77-0.94)	0.0021	1.01 (0.91-1.12)	0.8411	0.92 (0.88-0.96)	0.0001	0.97 (0.92-1.01)	0.1619	0.91 (0.87-0.95)	< 0.0001	0.91 (0.87-0.95)	< 0.0001
	2010-2014 vs. 2000-2004	0.93 (0.82-1.06)	0.2785	0.94 (0.89-0.99)	0.0254	0.95 (0.91-0.99)	0.0208	0.94 (0.91-0.98)	0.0027	0.88 (0.79-0.98)	0.0174	0.97 (0.86-1.08)	0.5663	0.90 (0.85-0.95)	< 0.0001	1.01 (0.96-1.06)	0.6202	0.89 (0.84-0.93)	< 0.0001	0.96 (0.91-1.01)	0.1035
	2015-2019 vs. 2000-2004	0.90 (0.72-1.12)	0.3413	0.95 (0.87-1.04)	0.2899	0.90 (0.84-0.95)	0.0007	0.93 (0.88-0.98)	0.0118	0.81 (0.70-0.95)	0.0077	1.01 (0.85-1.19)	0.9252	0.90 (0.82-0.98)	0.0132	1.12 (1.05-1.19)	0.0009	0.77 (0.70-0.83)	< 0.0001	1.11 (1.03-1.20)	0.0068
	2010-2014 vs. 2005-2009	1.19 (1.04-1.36)	0.0101	1.01 (0.95-1.06)	0.8359	0.93 (0.89-0.97)	0.0011	0.99 (0.95-1.02)	0.5284	0.96 (0.88-1.06)	0.4776	0.91 (0.82-1.01)	0.0863	0.98 (0.93-1.03)	0.4377	1.03 (0.99-1.08)	0.1689	0.99 (0.94-1.04)	0.6486	1.05 (0.99-1.10)	0.0541
	2015-2019 vs. 2005-2009	1.04 (0.83-1.30)	0.7406	1.02 (0.94-1.12)	0.6192	0.84 (0.79-0.89)	< 0.0001	0.93 (0.88-0.99)	0.0167	0.85 (0.74-0.97)	0.0197	0.93 (0.80-1.08)	0.3572	0.95 (0.87-1.03)	0.2013	1.11 (1.04-1.18)	0.0015	0.86 (0.79-0.93)	0.0003	1.16 (1.08-1.25)	< 0.0001
	2015-2019 vs. 2010-2014	0.92 (0.74-1.13)	0.4239	0.94 (0.86-1.02)	0.1485	0.91 (0.86-0.97)	0.002	0.93 (0.88-0.98)	0.0066	0.88 (0.77-0.99)	0.0478	1.03 (0.89-1.19)	0.7078	0.92 (0.85-1.00)	0.055	1.07 (1.00-1.13)	0.0353	0.85 (0.78-0.92)	< 0.0001	1.08 (1.01-1.16)	0.0284
	* Log-rank p value < 0.0033 was considered statistically significant in pairwise-comparison analysis.
